# Supplementary material for: Heavier- and lighter-load isolated lumbar extension resistance training produce similar strength increases, but different perceptual responses, in healthy males and females
Source: PeerJ. 2018 Nov 22;6:e6001. doi: 10.7717/peerj.6001 (PMC6252242; doi:10.7717/peerj.6001)
Supplement: Supplemental Information 1 [file peerj-06-6001-s001.xlsx]

## Sheet: Sheet1
Sex	Age	Height	Hcm	Mass	Mkg	Group	PreSI	Pre MVC	AVG TUL	AVG Reps	Post SI	Post MVC	PreSINm	Pre MVCNm	Post SINm	Post MVCNm	Change SI Nm	Change MVC NM	Avg Discomfort
1	21	70	177.8	150	68.0388	1	13869	258	62.5	10.4167	17203	271	18778.6	349.332	23292.9	366.934	4514.24	17.602	6.8
1	21	63	160.02	108	48.9879	1	11850	200	34.8	5.8	12181	207	16044.9	270.8	16493.1	280.278	448.174	9.478	6.2
2	20	71	180.34	179	81.193	1	20202	364	56.1	9.35	21600	360	27353.5	492.856	29246.4	487.44	1892.89	-5.416	4.8		6 females
2	22	68	172.72	134	60.7813	1	8805	135	84.3	14.05	12554	207	11922	182.79	16998.1	280.278	5076.15	97.488	5.2		7 males
2	22	67	170.18	150	68.0388	1	15714	295	41.7	6.95	16398	297	21276.8	399.43	22202.9	402.138	926.136	2.708	4
2	20	74	187.96	170	77.1106	1	14657	288	38.3	6.38333	18442	300	19845.6	389.952	24970.5	406.2	5124.89	16.248	4.7
2	39	71	180.34	196	88.904	1	20730	334	60.1	10.0167	21722	364	28068.4	452.236	29411.6	492.856	1343.17	40.62	4.8
2	23	73	185.42	215	97.5223	1	19999	415	28.9	4.81667	24598	499	27078.6	561.91	33305.7	675.646	6227.05	113.736	4
1	22	66	167.64	149.9	67.9934	1	10271	170	59.8	9.96667	11875	207	13906.9	230.18	16078.8	280.278	2171.82	50.098	3.5
1	21	65.8	167.132	157.63	71.4997	1	9916	190	32.3	5.38333	12599	278	13426.3	257.26	17059	376.412	3632.78	119.152	3.7
2	23	68	172.72	160	72.5747	1	15333	232	46.2	7.7	17414	280	20760.9	314.128	23578.6	379.12	2817.67	64.992	4.8
1	24	62	157.48	139	63.0493	1	12147	211	56	9.33333	13336	268	16447	285.694	18056.9	362.872	1609.91	77.178	9.5
1	19	63	160.02	125	56.699	1	12824	214	54.8	9.13333	14202	255	17363.7	289.756	19229.5	345.27	1865.81	55.514	9.5
	23.0909	67.8308	172.29	156.425	70.9533	1	14332.1	254.308	50.4462	8.40769	16471.1	291.769	19405.6	344.333	22301.8	395.056	2896.21	50.7229	5.5
	5.37503	3.85646	9.79542	28.8235	13.0741	0	3984.21	81.3607	15.3683	2.56138	4184.12	80.1802	5394.62	110.162	5665.3	108.564	1837.44	42.1433	2.0025
1	20	68	172.72	130	58.967	2	7982	152	220.5	36.75	8214	160	10807.6	205.808	11121.8	216.64	314.128	10.832	8.2
1	23	68	172.72	170	77.1106	2	13880	219	240.8	40.1333	15814	310	18793.5	296.526	21412.2	419.74	2618.64	123.214	7.7
1	22	69	175.26	181	82.1002	2	13639	254	123.6	20.6	14718	264	18467.2	343.916	19928.2	357.456	1460.97	13.54	7.2		6 females
1	21	68	172.72	132	59.8741	2	14080	254	116.4	19.4	13270	243	19064.3	343.916	17967.6	329.022	-1096.74	-14.894	6.8		7 males
2	22	73	185.42	194	87.9968	2	14371	299	114.8	19.1333	17400	306	19458.3	404.846	23559.6	414.324	4101.27	9.478	5.7
2	22	69	175.26	174	78.925	2	17571	286	133.3	22.2167	17425	285	23791.1	387.244	23593.5	385.89	-197.684	-1.354	7.8
1	20	66	167.64	140	63.5029	2	9949	179	233.8	38.9667	12176	193	13470.9	242.366	16486.3	261.322	3015.36	18.956	7.5
2	29	69	175.26	148	67.1316	2	17242	278	172.9	28.8167	21900	324	23345.7	376.412	29652.6	438.696	6306.93	62.284	7.8
2	22	68	172.72	165	74.8427	2	14634	250	173.5	28.9167	15252	270	19814.4	338.5	20651.2	365.58	836.772	27.08	8.8
2	20	73	185.42	179	81.193	2	17506	278	99.3	16.55	21571	360	23703.1	376.412	29207.1	487.44	5504.01	111.028	10
1	22	66	167.64	158	71.6675	2	10663	183	136.6	22.7667	15444	245	14437.7	247.782	20911.2	331.73	6473.47	83.948	7.8
2	20	73	185.42	177	80.2858	2	17896	297	146.5	24.4167	20418	312	24231.2	402.138	27646	422.448	3414.79	20.31	10
2	23	67	170.18	139	63.0493	2	12338	203	146.5	24.4167	15608	311	16705.7	274.862	21133.2	421.094	4427.58	146.232	9.5
	22.0909	69	174.798	160.538	73.0283	2	13980.8	240.923	158.346	26.75	16093.1	275.615	18650.4	323.975	21317.4	364.349	2667.01	40.3738	8.06154
	2.50817	2.48328	5.88252	20.891	9.62214	0	3135.07	48.9378	47.0167	8.5302	3814.89	55.2201	4269.88	66.5063	5319.69	78.4233	2658.57	47.1294	1.24869

## Sheet: Sheet2
Sex	Age	Height	Hcm	Mass	Mkg	Group	PreSI	Pre MVC	Post SI	Post MVC	PreSINm	Pre MVCNm	Post SINm	Post MVCNm	Change MVC	Change SI	Avg Discomfort
1	21	70	177.8	150	68.0388	1	13869	258	17203	271	18778.6	349.332	23292.9	366.934	4514.24	17.602	6.8
1	21	63	160.02	108	48.9879	1	11850	200	12181	207	16044.9	270.8	16493.1	280.278	448.174	9.478	6.2
1	22	66	167.64	149.9	67.9934	1	10271	170	11875	207	13906.9	230.18	16078.8	280.278	2171.82	50.098	3.5
1	21	65.8	167.132	157.63	71.4997	1	9916	190	12599	278	13426.3	257.26	17059	376.412	3632.78	119.152	3.7
1	20	68	172.72	130	58.967	2	7982	152	8214	160	10807.6	205.808	11121.8	216.64	314.128	10.832	8.2
1	23	68	172.72	170	77.1106	2	13880	219	15814	310	18793.5	296.526	21412.2	419.74	2618.64	123.214	7.7
1	22	69	175.26	181	82.1002	2	13639	254	14718	264	18467.2	343.916	19928.2	357.456	1460.97	13.54	7.2
1	21	68	172.72	132	59.8741	2	14080	254	13270	243	19064.3	343.916	17967.6	329.022	-1096.74	-14.894	6.8
1	20	66	167.64	140	63.5029	2	9949	179	12176	193	13470.9	242.366	16486.3	261.322	3015.36	18.956	7.5
1	22	66	167.64	158	71.6675	2	10663	183	11358	245	14437.7	247.782	15378.7	331.73	941.03	83.948	7.8
Avg Tot	21.3	66.98	170.129	147.653
Avg HL	21.25	66.2	168.148	141.382
Avg LL	21.3333	67.5	171.45	151.833
2	20	71	180.34	179	81.193	1	20202	364	21600	360	27353.5	492.856	29246.4	487.44	1892.89	-5.416	4.8
2	22	68	172.72	134	60.7813	1	8805	135	12554	207	11922	182.79	16998.1	280.278	5076.15	97.488	5.2
2	22	67	170.18	150	68.0388	1	15714	295	16398	297	21276.8	399.43	22202.9	402.138	926.136	2.708	4
2	20	74	187.96	170	77.1106	1	14657	288	18442	300	19845.6	389.952	24970.5	406.2	5124.89	16.248	4.7
2	39	71	180.34	196	88.904	1	20730	334	21722	364	28068.4	452.236	29411.6	492.856	1343.17	40.62	4.8
2	23	73	185.42	215	97.5223	1	19999	415	24598	499	27078.6	561.91	33305.7	675.646	6227.05	113.736	4
2	23	68	172.72	160	72.5747	1	15333	232	17414	280	20760.9	314.128	23578.6	379.12	2817.67	64.992	4.8
2	22	73	185.42	194	87.9968	2	14371	299	17400	306	19458.3	404.846	23559.6	414.324	4101.27	9.478	5.7
2	22	69	175.26	174	78.925	2	17571	286	17425	285	23791.1	387.244	23593.5	385.89	-197.684	-1.354	7.8
2	29	69	175.26	148	67.1316	2	17242	278	21900	324	23345.7	376.412	29652.6	438.696	6306.93	62.284	7.8
2	22	68	172.72	165	74.8427	2	14634	250	15252	270	19814.4	338.5	20651.2	365.58	836.772	27.08	8.8
2	20	73	185.42	179	81.193	2	17506	278	21571	360	23703.1	376.412	29207.1	487.44	5504.01	111.028	10
Avg Tot	23.6667	70.3333	178.647	172
Avg HL	24.1429	70.2857	178.526	172
Avg LL	23	70.4	178.816	172
